# Supplementary material for: Genome-Wide Association Study of Pancreatic Cancer in Japanese Population
Source: PLoS One. 2010 Jul 29;5(7):e11824. doi: 10.1371/journal.pone.0011824 (PMC2912284; doi:10.1371/journal.pone.0011824)
Supplement: Table S4 — Association study of SNPs which shown to be significantly associated with increased risk of pancreatic cancer in Caucasian population in Japanese. (0.02 MB XLS) [file pone.0011824.s004.xls]

## Sheet: Supp.4
Table S4: Association study of SNPs which shown to be significantly associated with increased risk of pancreatic cancer in Caucasian population in Japanese population
CHR*	SNP	Position*	Risk allele	RAF		Allelic				Dominant				Recessive				Pmin	Gene
				Case	Control	P-value	OR	L95	U95	P-value	OR	L95	U95	P-value	OR	L95	U95
9	rs505922	135139050	G	0.4809	0.4562	0.03692	1.11	1.006	1.224	0.04286	1.175	1.005	1.373	0.1783	1.121	0.9493	1.323	0.03692	ABO
13	rs9543325	72814629	G	0.5554	0.5075	0.0001694	1.20992	1.09553	1.33636	4.902e-05	1.36743	1.17578	1.59058	0.04379	1.19076	1.00482	1.41103	4.902e-05	No Gene
13	rs9564966	72794222	A	0.5478	0.5048	0.0006815	1.18708	1.07527	1.31044	0.0001768	1.33726	1.14877	1.55666	0.08013	1.16144	0.982318	1.37344	0.0001768	No Gene
1	rs3790844	198274055	A	0.328	0.3001	0.01237	1.143	1.029	1.27	0.0091	1.203	1.047	1.383	0.2653	1.141	0.9049	1.438	0.0091	NR5A2
1	rs10919791	198231791	G	0.3075	0.2821	0.02617	1.129	1.014	1.256	0.01996	1.179	1.026	1.354	0.3484	1.124	0.88	1.437	0.01996	NR5A2
Odds ratios, 95% confidence limits and P-values were obtained using logistic regression analysis according to allelic, dominant and recessive model after adjustment of age, sex and smoking.
RAF, risk allele frequency; OR, odds ratio; L95 U95, lower and upper confidence limits; Pmin, minimum P-value among three genetic models;
*Position based on NCBI Human Genome Build 36.
